# Supplementary material
Source: Springer Nature journal article supplement (https://www.springermedizin.de/resource/supplementary/10194_2012_3_MOESM1_ESM.pdf/9422534)

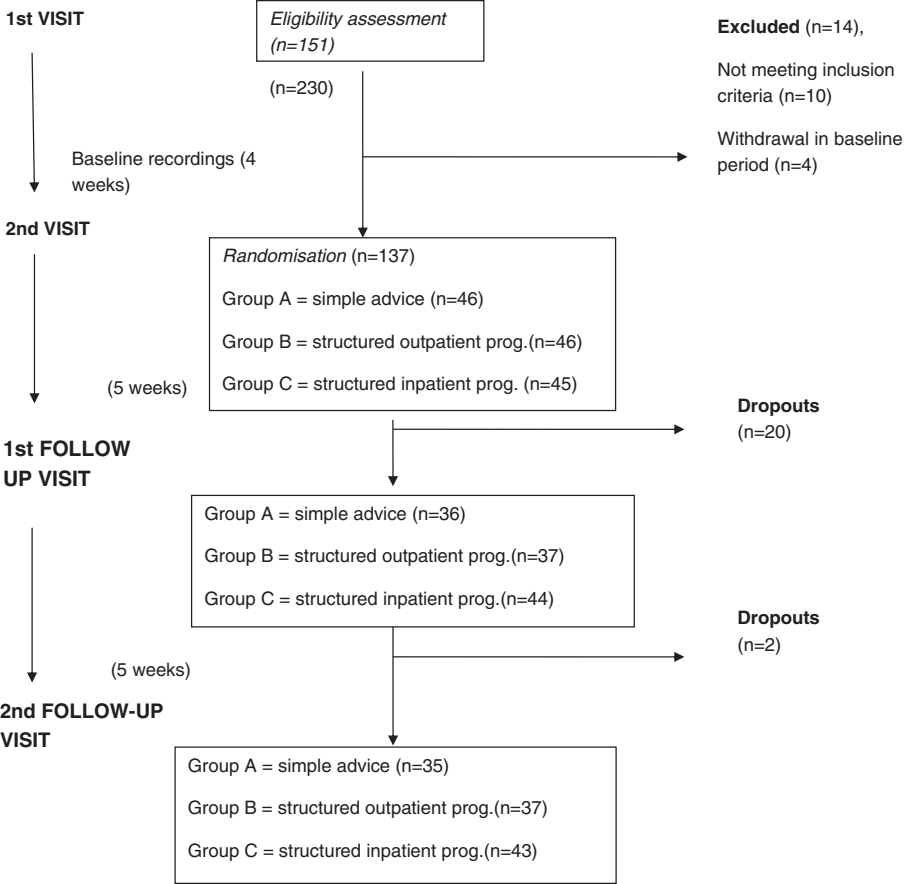

Supplement: MOESM1 [file 9422534]
